# Supplementary material for: A Survey of Potentially Pathogenic-Incriminated Arthropod Vectors of Health Concern in Botswana
Source: MDPI journal article supplement (doi:10.3390/ijerph181910556), 2021-10-08
Supplement: s1 [file s1]

## A survey of potentially pathogenic-incriminated arthropod vectors of health concern in Botswana

### Survey summary

Arthropods play a critical role as disease vectors causing morbidity and mortality globally. The current global change projections are likely to proliferate vectors and associated pathogens, exacerbating arthropod-borne infection risks. Common vectors of medical importance include; cockroaches, lice, bedbugs, fleas, ticks, flies and mosquitoes. This survey is a baseline scoping of potential arthropod vectors of health concern in Botswana. The main aim is to ascertain spatio-temporal patterns in knowledge and perceptions of these potential vector arthropods by the public. This will bridge knowledge gaps for improvement in health, well-being and livelihoods across the country. The survey is voluntary and can be completed by individuals above  $\geq 16$  years of age.

### Household Questionnaire

Interviewer ID:

Date: \_\_\_\_\_ / \_\_\_\_\_ / 2020

Respondent Name:

Surname:

1. Do you agree to participate in this survey?

Yes=1

No=2

| 2. Do you know if any arthropods carry/ cause diseases to; | Yes=1<br>No=2<br>Not sure=3 |
|------------------------------------------------------------|-----------------------------|
| (i) Humans?                                                |                             |
| (ii) Livestock?                                            |                             |
| (iii) Wildlife?                                            |                             |

|  |  |
|--|--|
|  |  |
|--|--|

| Arthropod vectors  | 3. Do you know              | 4. Are there different types of this vector?  | 5. Have you seen the vector? | 6. What feature(s) do you use to identify the vector?                                | 7. Last time seen?                                                                                               | 8. Have you ever experienced infestation in your household? | 9. What attracts this vector in homesteads?<br>Pit latrines=1<br>Sewage systems=2<br>Rubbish=3<br>Food=4<br>Warm places=5<br>Suitable refuge space=6<br>Hosts=7<br>I don't know=8<br>Other=9 | 10. How concerned are you about its burden?                                                    | 11. Do they transmission pathogens causing diseases? | 12. Name of diseases transmitted/ caused | 13. Season of abundance.                                                                                                                | 14. When are vectors more active?                                                             | 15. How do you control the vectors?                                                                                                                    |
|--------------------|-----------------------------|-----------------------------------------------|------------------------------|--------------------------------------------------------------------------------------|------------------------------------------------------------------------------------------------------------------|-------------------------------------------------------------|----------------------------------------------------------------------------------------------------------------------------------------------------------------------------------------------|------------------------------------------------------------------------------------------------|------------------------------------------------------|------------------------------------------|-----------------------------------------------------------------------------------------------------------------------------------------|-----------------------------------------------------------------------------------------------|--------------------------------------------------------------------------------------------------------------------------------------------------------|
| (i)<br>Cockroaches | Yes=1<br>No=2<br>Not sure=3 | Yes=1<br>No=2<br>Not sure=3<br>I don't know=4 | Yes=1<br>No=2<br>Not sure=3  | Shape=1<br>Movement=2<br>Colour=3<br>Sound=4<br>Bites=5<br>I don't know=6<br>Other=7 | 0-7days=1<br>1-3months=2<br>4-12months=3<br>1-5yrs=4<br>6-10yrs=5<br>≥10years=6<br>Not sure=7<br>Never seen it=8 | Yes=1<br>No=2<br>Not sure=3                                 |                                                                                                                                                                                              | Not concerned=1<br>Little Concerned=2<br>Concerned=3<br>Strongly Concerned=4<br>I don't know=5 | Yes=1<br>No=2<br>Not sure=3                          |                                          | Summer=1<br>(Nov-Jan)<br>Autumn=2<br>(Feb-Apr)<br>Winter=3<br>(May- Jul)<br>Spring=4<br>(Aug-Oct)<br>All year round=5<br>I don't know=6 | Morning=1<br>Afternoon=2<br>Evening=3<br>Night=4<br>All day=5<br>Not Sure=6<br>I don't know=7 | Insecticides=1<br>Physical kill=2<br>Improved hygiene=3<br>Electrical devices=4<br>Sticky pads=5<br>Seal/ close entry points=6<br>Nothing=7<br>Other=8 |
| (ii)<br>Lice       |                             |                                               |                              |                                                                                      |                                                                                                                  |                                                             |                                                                                                                                                                                              |                                                                                                |                                                      |                                          |                                                                                                                                         |                                                                                               |                                                                                                                                                        |
| (iii)<br>Ticks     |                             |                                               |                              |                                                                                      |                                                                                                                  |                                                             |                                                                                                                                                                                              |                                                                                                |                                                      |                                          |                                                                                                                                         |                                                                                               |                                                                                                                                                        |
| (iv)<br>Flies      |                             |                                               |                              |                                                                                      |                                                                                                                  |                                                             |                                                                                                                                                                                              |                                                                                                |                                                      |                                          |                                                                                                                                         |                                                                                               |                                                                                                                                                        |
| (v)<br>Mosquitoes  |                             |                                               |                              |                                                                                      |                                                                                                                  |                                                             |                                                                                                                                                                                              |                                                                                                |                                                      |                                          |                                                                                                                                         |                                                                                               |                                                                                                                                                        |
| (vi)<br>Bedbugs    |                             |                                               |                              |                                                                                      |                                                                                                                  |                                                             |                                                                                                                                                                                              |                                                                                                |                                                      |                                          |                                                                                                                                         |                                                                                               |                                                                                                                                                        |
| (vii)<br>Fleas     |                             |                                               |                              |                                                                                      |                                                                                                                  |                                                             |                                                                                                                                                                                              |                                                                                                |                                                      |                                          |                                                                                                                                         |                                                                                               |                                                                                                                                                        |

**16. Why do you think arthropod vectors bite?**

To transmit parasites=1      For feeding (food)=2      Seek refuge=3      Not sure=4      I don't know=5      Other=6 \_\_\_\_\_

**17. Which other arthropod vector(s) do you think are of public health concern in Botswana?****18. In which district do you live?**

North-West=1      North-East=2      South-East=3      Southern=4      Ghanzi=5      Chobe=6  
Kgatleng=7      Kweneng=8      Central=9      Kgalagadi=10

**19. Describe your locality (area of residence).**

Rural=1      Semi-urban=2      Urban=3      Peri-urban=4

**20. What is your source of income?**

Employee=1    Entrepreneur=2    Self-employed=3    Student allowance=4    Farmer=5    Pension fund=6  
Government poverty alleviation funds=7    Nothing=8    Family=9    Other=10 \_\_\_\_\_

**21. Marital status**

Single=1    Married=2    Divorced=3    Widowed=4    Staying together=5    Prefer not to say=6

**22. Are you literate?**

Yes=1      No=2      Prefer not to say=3

**23. What is your highest level of education?**

None=1    Primary=2    BGJC (form 3)=3    BGCSE (form 5)=4    Vocational=5    Tertiary=6

**24. Age**

16- 19=1      20- 29=2      30- 39=3      40- 49=4      50- 59=5      60+ years=6

**25. Gender**

Female=1      Male=2      Prefer not to say=3
